# Supplementary material
Source: publisher figshare collection journal article supplement (https://gsajournals.figshare.com/ndownloader/files/27382553)
Supplement: Supplementary file 1 [file 27382553]

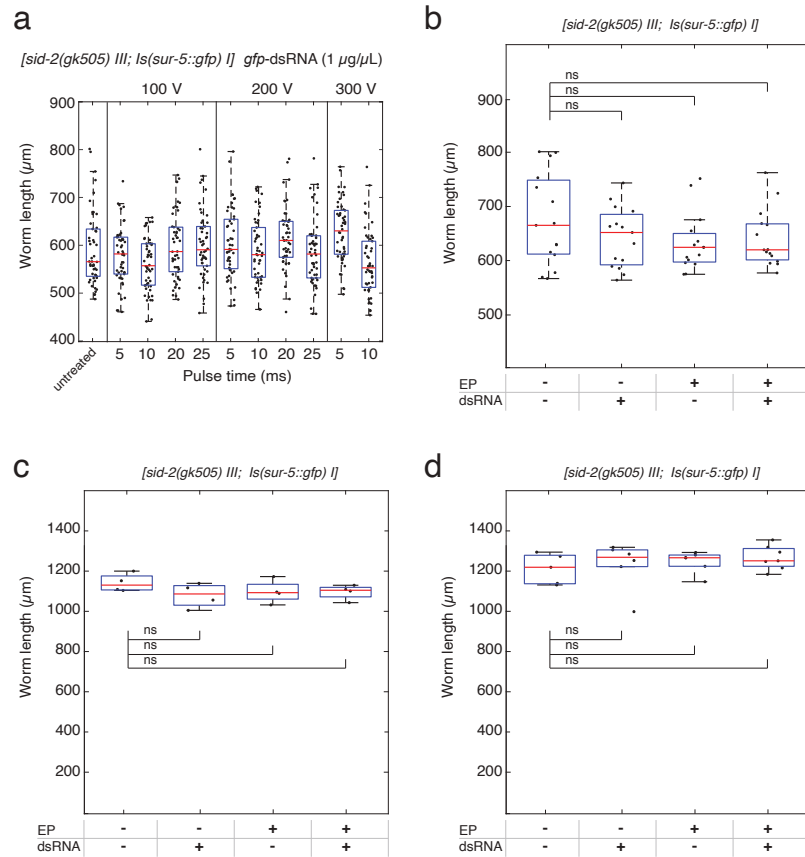

**Figure S1.** Body lengths of BIG0107 worms, electroporated at different conditions.

**(a)** Synchronized L1 populations of BIG0107 *[sid-2(gk505) III; ls(sur-5::gfp) I]* worms were electroporated with *gfp*-dsRNA of 1  $\mu\text{g}/\mu\text{L}$  using different conditions (discharge voltage and pulse time). Animals placed in electroporation buffer without dsRNA or electric discharge were used as "untreated" controls. For each condition, body length of worms (n=50) was measured. Results show no significant difference in length between electroporated and untreated animals (ANOVA test with Bonferroni correction). Red lines indicate means, blue boxes show 25th and 75th percentiles, whiskers show the data distribution range. Body lengths of BIG0107 *[sid-2(gk505) III; ls(sur-5::gfp) I]* worms, electroporated at **(b)** L1 stage, **(c)** L4 stage, and **(d)** Young Adult stage with *gfp*-dsRNA of 1  $\mu\text{g}/\mu\text{L}$ . As controls untreated animals (electroporation (-)/dsRNA (-)), electroporated animals without dsRNA (electroporation (+)/dsRNA (-)) and animals incubated with dsRNA (electroporation (-)/dsRNA (+)) were used. Body lengths were measured 48 hours after the treatment. Results show no significant difference in length between electroporated and control animals (ANOVA test with Bonferroni correction). Red lines indicate means, blue boxes show 25th and 75th percentiles, whiskers show the data distribution range.
